# Supplementary material for: Intense Testing and Use of Vitamin D Supplements Leads to Slow Improvement in Vitamin D Adequacy Rates: A Cross-Sectional Analysis of Real-World Data
Source: MDPI journal article supplement (doi:10.3390/nu16010111), 2023-12-28
Supplement: s1 [file s1]

# Intense Testing and Use of Vitamin D Supplements Leads to Slow Improvement in Vitamin D Adequacy Rates: A Cross-Sectional Analysis of Real-World Data

Rodis D. Paparodis, Dimitra Bantouna, Evangelos Karvounis, Ioannis Zoupas, Sarantis Livadas, Nicholas Angelopoulos, Shahnawaz Imam, Dimitrios T. Papadimitriou and Juan C. Jaume

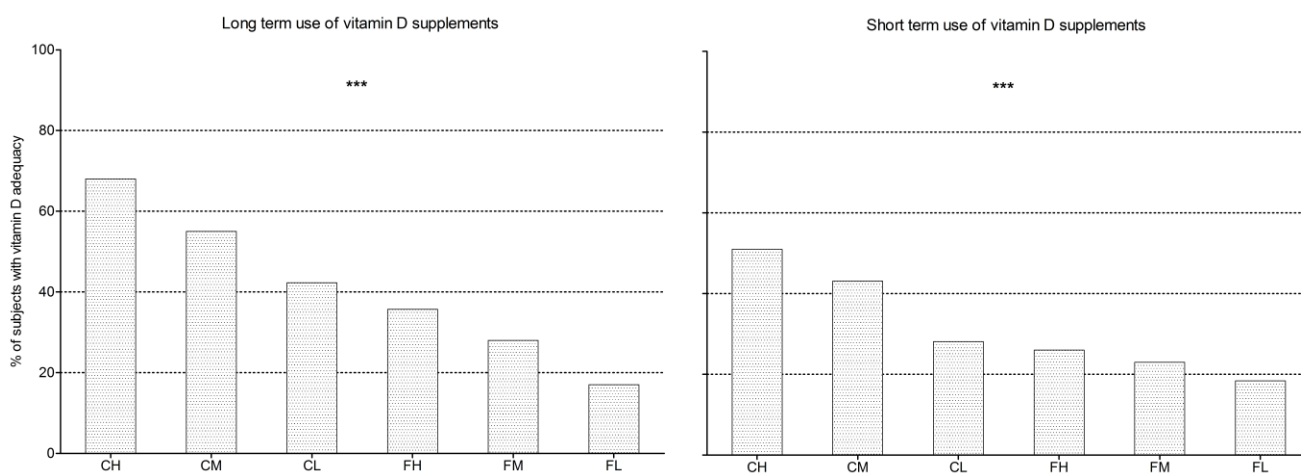

**Figure S1.** The effects of the duration of VDS related to the dose used. A. Subjects with long term use of vitamin D containing supplements. B Subjects with short term use of vitamin D containing supplements. Legend: \*\*\*:  $p < 0.001$ .
